# Supplementary material for: Meta-Analysis of Oral Anticoagulants and Adverse Outcomes in Atrial Fibrillation Patients After Intracranial Hemorrhage
Source: Frontiers journal article supplement (doi:10.3389/fcvm.2022.961000), 2022-07-15
Supplement: Data_Sheet_1.PDF [file Data_Sheet_1.PDF]

**Supplemental Table 1 PRISMA 2020 Checklist**

| Section and Topic       | Item # | Checklist item                                                                                                                                                                                                                                                                                       | Location where item is reported |
|-------------------------|--------|------------------------------------------------------------------------------------------------------------------------------------------------------------------------------------------------------------------------------------------------------------------------------------------------------|---------------------------------|
| <b>TITLE</b>            |        |                                                                                                                                                                                                                                                                                                      |                                 |
| Title                   | 1      | Identify the report as a systematic review.                                                                                                                                                                                                                                                          | Page 1                          |
| <b>ABSTRACT</b>         |        |                                                                                                                                                                                                                                                                                                      |                                 |
| Abstract                | 2      | See the PRISMA 2020 for Abstracts checklist.                                                                                                                                                                                                                                                         | Page 2                          |
| <b>INTRODUCTION</b>     |        |                                                                                                                                                                                                                                                                                                      |                                 |
| Rationale               | 3      | Describe the rationale for the review in the context of existing knowledge.                                                                                                                                                                                                                          | Page 4                          |
| Objectives              | 4      | Provide an explicit statement of the objective(s) or question(s) the review addresses.                                                                                                                                                                                                               | Page 4, 5                       |
| <b>METHODS</b>          |        |                                                                                                                                                                                                                                                                                                      |                                 |
| Eligibility criteria    | 5      | Specify the inclusion and exclusion criteria for the review and how studies were grouped for the syntheses.                                                                                                                                                                                          | Page 5, 6                       |
| Information sources     | 6      | Specify all databases, registers, websites, organisations, reference lists and other sources searched or consulted to identify studies. Specify the date when each source was last searched or consulted.                                                                                            | Page 5                          |
| Search strategy         | 7      | Present the full search strategies for all databases, registers and websites, including any filters and limits used.                                                                                                                                                                                 | Page 5                          |
| Selection process       | 8      | Specify the methods used to decide whether a study met the inclusion criteria of the review, including how many reviewers screened each record and each report retrieved, whether they worked independently, and if applicable, details of automation tools used in the process.                     | Page 6, 7                       |
| Data collection process | 9      | Specify the methods used to collect data from reports, including how many reviewers collected data from each report, whether they worked independently, any processes for obtaining or confirming data from study investigators, and if applicable, details of automation tools used in the process. | Page 6, 7                       |
| Data items              | 10a    | List and define all outcomes for which data were sought. Specify whether all results that were compatible with each outcome domain in each study were sought (e.g. for all measures, time points, analyses), and if not, the methods used to decide which results to collect.                        | Page 6, 7                       |

| Section and Topic             | Item # | Checklist item                                                                                                                                                                                                                                                    | Location where item is reported |
|-------------------------------|--------|-------------------------------------------------------------------------------------------------------------------------------------------------------------------------------------------------------------------------------------------------------------------|---------------------------------|
| Data items                    | 10b    | List and define all other variables for which data were sought (e.g. participant and intervention characteristics, funding sources). Describe any assumptions made about any missing or unclear information.                                                      | Page 6, 7                       |
| Study risk of bias assessment | 11     | Specify the methods used to assess risk of bias in the included studies, including details of the tool(s) used, how many reviewers assessed each study and whether they worked independently, and if applicable, details of automation tools used in the process. | Page 7                          |
| Effect measures               | 12     | Specify for each outcome the effect measure(s) (e.g. risk ratio, mean difference) used in the synthesis or presentation of results.                                                                                                                               | Page 7                          |
| Synthesis methods             | 13a    | Describe the processes used to decide which studies were eligible for each synthesis (e.g. tabulating the study intervention characteristics and comparing against the planned groups for each synthesis (item #5)).                                              | Page 7, 8                       |
|                               | 13b    | Describe any methods required to prepare the data for presentation or synthesis, such as handling of missing summary statistics, or data conversions.                                                                                                             | Page 7, 8                       |
|                               | 13c    | Describe any methods used to tabulate or visually display results of individual studies and syntheses.                                                                                                                                                            | Page 7, 8                       |
|                               | 13d    | Describe any methods used to synthesize results and provide a rationale for the choice(s). If meta-analysis was performed, describe the model(s), method(s) to identify the presence and extent of statistical heterogeneity, and software package(s) used.       | Page 7, 8                       |
|                               | 13e    | Describe any methods used to explore possible causes of heterogeneity among study results (e.g. subgroup analysis, meta-regression).                                                                                                                              | Page 7, 8                       |
|                               | 13f    | Describe any sensitivity analyses conducted to assess robustness of the synthesized results.                                                                                                                                                                      | Page 7, 8                       |
| Reporting bias assessment     | 14     | Describe any methods used to assess risk of bias due to missing results in a synthesis (arising from reporting biases).                                                                                                                                           | Page 7, 8                       |

| Section and Topic             | Item # | Checklist item                                                                                                                                                                                                                                                                       | Location where item is reported |
|-------------------------------|--------|--------------------------------------------------------------------------------------------------------------------------------------------------------------------------------------------------------------------------------------------------------------------------------------|---------------------------------|
| Certainty assessment          | 15     | Describe any methods used to assess certainty (or confidence) in the body of evidence for an outcome.                                                                                                                                                                                | Page 7, 8                       |
| <b>RESULTS</b>                |        |                                                                                                                                                                                                                                                                                      |                                 |
| Study selection               | 16a    | Describe the results of the search and selection process, from the number of records identified in the search to the number of studies included in the review, ideally using a flow diagram.                                                                                         | Page 8                          |
|                               | 16b    | Cite studies that might appear to meet the inclusion criteria, but which were excluded, and explain why they were excluded.                                                                                                                                                          | Page 8                          |
| Study characteristics         | 17     | Cite each included study and present its characteristics.                                                                                                                                                                                                                            | Page 8, 9                       |
| Risk of bias in studies       | 18     | Present assessments of risk of bias for each included study.                                                                                                                                                                                                                         | Page 9                          |
| Results of individual studies | 19     | For all outcomes, present, for each study: (a) summary statistics for each group (where appropriate) and (b) an effect estimate and its precision (e.g. confidence/credible interval), ideally using structured tables or plots.                                                     | Page 9, 10                      |
| Results of syntheses          | 20a    | For each synthesis, briefly summarise the characteristics and risk of bias among contributing studies.                                                                                                                                                                               | Page 9, 10                      |
|                               | 20b    | Present results of all statistical syntheses conducted. If meta-analysis was done, present for each the summary estimate and its precision (e.g. confidence/credible interval) and measures of statistical heterogeneity. If comparing groups, describe the direction of the effect. | Page 9, 10                      |
|                               | 20c    | Present results of all investigations of possible causes of heterogeneity among study results.                                                                                                                                                                                       | Page 9, 10                      |
|                               | 20d    | Present results of all sensitivity analyses conducted to assess the robustness of the synthesized results.                                                                                                                                                                           | Page 9, 10                      |

| Section and Topic                              | Item # | Checklist item                                                                                                                                                                                                                             | Location where item is reported  |
|------------------------------------------------|--------|--------------------------------------------------------------------------------------------------------------------------------------------------------------------------------------------------------------------------------------------|----------------------------------|
| Reporting biases                               | 21     | Present assessments of risk of bias due to missing results (arising from reporting biases) for each synthesis assessed.                                                                                                                    | Page 10                          |
| Certainty of evidence                          | 22     | Present assessments of certainty (or confidence) in the body of evidence for each outcome assessed.                                                                                                                                        | Page 10                          |
| <b>DISCUSSION</b>                              |        |                                                                                                                                                                                                                                            |                                  |
| Discussion                                     | 23a    | Provide a general interpretation of the results in the context of other evidence.                                                                                                                                                          | Page 10-13                       |
|                                                | 23b    | Discuss any limitations of the evidence included in the review.                                                                                                                                                                            | Page 13                          |
|                                                | 23c    | Discuss any limitations of the review processes used.                                                                                                                                                                                      | Page 13                          |
|                                                | 23d    | Discuss implications of the results for practice, policy, and future research.                                                                                                                                                             | Page 11-13                       |
| <b>OTHER INFORMATION</b>                       |        |                                                                                                                                                                                                                                            |                                  |
| Registration and protocol                      | 24a    | Provide registration information for the review, including register name and registration number, or state that the review was not registered.                                                                                             | Page 5                           |
|                                                | 24b    | Indicate where the review protocol can be accessed, or state that a protocol was not prepared.                                                                                                                                             | Page 5                           |
|                                                | 24c    | Describe and explain any amendments to information provided at registration or in the protocol.                                                                                                                                            | Page 5                           |
| Support                                        | 25     | Describe sources of financial or non-financial support for the review, and the role of the funders or sponsors in the review.                                                                                                              | Page 14                          |
| Competing interests                            | 26     | Declare any competing interests of review authors.                                                                                                                                                                                         | Page 14                          |
| Availability of data, code and other materials | 27     | Report which of the following are publicly available and where they can be found: template data collection forms; data extracted from included studies; data used for all analyses; analytic code; any other materials used in the review. | In Supplemental table and figure |

*From:* Page MJ, McKenzie JE, Bossuyt PM, Boutron I, Hoffmann TC, Mulrow CD, et al. The PRISMA 2020 statement: an updated guideline for reporting systematic reviews. BMJ 2021;372:n71. doi: 10.1136/bmj.n71

For more information, visit: <http://www.prisma-statement.org/>

Supplemental Table 2 The search strategies until March 1, 2022

|               | Search terms                                                                                                                                                                                                                                                         | Items   |
|---------------|----------------------------------------------------------------------------------------------------------------------------------------------------------------------------------------------------------------------------------------------------------------------|---------|
| <b>PubMed</b> |                                                                                                                                                                                                                                                                      |         |
| #1            | “atrial fibrillation” OR “atrial flutter”                                                                                                                                                                                                                            | 100,096 |
| #2            | “intracranial hemorrhage” OR “intracranial bleeding” OR “intracerebral hemorrhage” OR “hemorrhagic stroke” OR “ICH”                                                                                                                                                  | 36,958  |
| #3            | “oral anticoagulant” OR “vitamin K antagonist” OR “VKA” OR ‘warfarin’ OR “non-vitamin K antagonist oral anticoagulant” OR “direct oral anticoagulant” OR “novel oral anticoagulant” OR “NOAC” OR “DOAC” OR “dabigatran” OR “rivaroxaban” OR “apixaban” OR “edoxaban” | 39,974  |
| #4            | #1 AND #2 AND #3                                                                                                                                                                                                                                                     | 1,131   |
| <b>Embase</b> |                                                                                                                                                                                                                                                                      |         |
| #1            | 'atrial fibrillation' OR 'atrial flutter'                                                                                                                                                                                                                            | 209,086 |
| #2            | 'intracranial hemorrhage' OR 'intracranial bleeding' OR 'intracerebral hemorrhage' OR 'hemorrhagic stroke' OR 'ICH'                                                                                                                                                  | 63,895  |
| #3            | 'oral anticoagulant' OR 'vitamin K antagonist' OR 'VKA' OR ‘warfarin’ OR 'non-vitamin K antagonist oral anticoagulant' OR 'direct oral anticoagulant' OR 'novel oral anticoagulant' OR 'NOAC' OR 'DOAC' OR 'dabigatran' OR 'rivaroxaban' OR 'apixaban' OR 'edoxaban' | 154,129 |
| #4            | #1 AND #2 AND #3                                                                                                                                                                                                                                                     | 2,659   |

**Supplemental Table 3. Excluding studies with reasons in this meta-analysis**

| Study items |                                                                                                                                                                                                                                                                                                                                 |
|-------------|---------------------------------------------------------------------------------------------------------------------------------------------------------------------------------------------------------------------------------------------------------------------------------------------------------------------------------|
| <b>NO.1</b> | <b>Sample size was less than 100 (n=5)</b>                                                                                                                                                                                                                                                                                      |
| 1           | Abrantes CS, Pintalhao M, Tavares S, Fonseca L, Chaves PC. Anticoagulation after intracerebral hemorrhage in patients with atrial fibrillation: between Scylla and Charybdis. NEUROL SCI. 2021.                                                                                                                                 |
| 2           | Vidal-Jordana A, Barroeta-Espar I, Sainz PM, Mateo J, Delgado-Mederos R, Marti-Fabregas J. [Intracerebral hemorrhage in anticoagulated patients: what do we do afterwards?]. NEUROLOGIA. 2012;27(3):136-142.                                                                                                                    |
| 3           | Claassen DO, Kazemi N, Zubkov AY, Wijdicks EF, Rabinstein AA. Restarting anticoagulation therapy after warfarin-associated intracerebral hemorrhage. Arch Neurol. 2008;65(10):1313-1318.                                                                                                                                        |
| 4           | Viswanathan A, Rakich SM, Engel C, Snider R, Rosand J, Greenberg SM, Smith EE. Antiplatelet use after intracerebral hemorrhage. NEUROLOGY. 2006;66(2):206-209.                                                                                                                                                                  |
| 5           | De Vleeschouwer S, Van Calenberg F, van Loon J, Nuttin B, Goffin J, Plets C. Risk analysis of thrombo-embolic and recurrent bleeding events in the management of intracranial haemorrhage due to oral anticoagulation. ACTA CHIR BELG. 2005;105(3):268-274.                                                                     |
| <b>NO.2</b> | <b>Studies did not reported adjusted or weighted HRs (n=6)</b>                                                                                                                                                                                                                                                                  |
| 1           | Sadighi A, Beckett L, DiCristina H, Wagner T, Wright K, Capone K, Monczewski M, Kester M, Bourdages G, Griessenauer C, Zand R. Long-term outcome of resuming anticoagulation after anticoagulation-associated intracerebral hemorrhage. eNeurologicalSci. 2020:100222.                                                          |
| 2           | Roquer J, Vivanco-Hidalgo RM, Prats-Sánchez LL, Martínez-Domeño A, Guisado-Alonso D, Cuadrado-Godia E, Giralte Steinhauer E, Jiménez-Conde J, Rodríguez-Campello A, Martí-Fàbregas J, Ois A. Interaction of atrial fibrillation and antithrombotics on outcome in intracerebral hemorrhage. NEUROLOGY. 2019;93(19):e1820-e1829. |
| 3           | Janumpally R, Ambartsumyan AS, Duan L, Gharibian D, Sangha N. Clinical outcomes of direct oral anticoagulants versus warfarin in patients with atrial fibrillation who have had an intracerebral hemorrhage. STROKE. 2018;49.                                                                                                   |
| 4           | Pennlert J, Overholser R, Asplund K, Carlberg B, Van Rompaye B, Wiklund P, Eriksson M. Optimal Timing of Anticoagulant Treatment After Intracerebral Hemorrhage in Patients With Atrial Fibrillation. STROKE. 2017;48(2):314-320.                                                                                               |
| 5           | Yung D, Kapral MK, Asllani E, Fang J, Lee DS. Reinitiation of anticoagulation after warfarin-associated intracranial hemorrhage and mortality risk: the Best Practice for Reinitiating Anticoagulation Therapy After Intracranial Bleeding (BRAIN) study. CAN J CARDIOL.                                                        |

---

2012;28(1):33-39.

- 6 Majeed A, Kim Y, Roberts RS, Holmström M, Schulman S. Optimal Timing of Resumption of Warfarin After Intracranial Hemorrhage. *STROKE*. 2010;41(12):2860-2866.

**NO.3 Studies focused on a mixed population, and AF subgroup was not separately analyzed (n=3)**

- 1 Poli D, Antonucci E, Vignini E, Martinese L, Testa S, Simioni P, Pengo V, Pignatelli P, Falanga A, Masciocco L, Barcellona D, Ciampa A, Chiarugi P, Paparo C, Ageno W, Palareti G. Anticoagulation resumption after intracranial hemorrhage in patients treated with VKA and DOACs. *EUR J INTERN MED*. 2020;80:73-77.
- 2 Billings JD, Khan AD, McVicker JH, Schroepel TJ. Newer and Better? Comparing Direct Oral Anticoagulants to Warfarin in Patients With Traumatic Intracranial Hemorrhage. *Am Surg*. 2020;86(9):1062-1066.
- 3 Ottosen TP, Grijota M, Hansen ML, Brandes A, Damgaard D, Husted SE, Johnsen SP. Use of Antithrombotic Therapy and Long-Term Clinical Outcome Among Patients Surviving Intracerebral Hemorrhage. *STROKE*. 2016;47(7):1837-1843.

**NO.4 Studies did not reported the studied outcomes (n=4)**

- 1 Stanton RJ, Eckman MH, Woo D, Moomaw CJ, Haverbusch M, Flaherty ML, Kleindorfer DO. Ischemic Stroke and Bleeding: Clinical Benefit of Anticoagulation in Atrial Fibrillation After Intracerebral Hemorrhage. *STROKE*. 2020;51(3):808-814.
- 2 Kato Y, Hayashi T, Suzuki K, Maruyama H, Kikkawa Y, Kurita H, Takao M. Resumption of Direct Oral Anticoagulants in Patients with Acute Spontaneous Intracerebral Hemorrhage. *Journal of Stroke and Cerebrovascular Diseases*. 2019;28(10):104292.
- 3 Vestergaard AS, Skjoth F, Lip GY, Larsen TB. Effect of Anticoagulation on Hospitalization Costs After Intracranial Hemorrhage in Atrial Fibrillation: A Registry Study. *STROKE*. 2016;47(4):979-985.
- 4 Pennlert J, Asplund K, Carlberg B, Wiklund P, Wisten A, Åsberg S, Eriksson M. Antithrombotic Treatment Following Intracerebral Hemorrhage in Patients With and Without Atrial Fibrillation. *STROKE*. 2015;46(8):2094-2099.

**NO.5 Studies focused on AF patients with non-ICH bleeding (n=4)**

- 1 Yokoyama M, Mizuma A, Terao T, Tanaka F, Nishiyama K, Hasegawa Y, Nagata E, Nogawa S, Kobayashi H, Yanagimachi N, Okazaki T, Kitagawa K, Takizawa S. Effectiveness of Nonvitamin K Antagonist Oral Anticoagulants and Warfarin for Preventing Further Cerebral Microbleeds in Acute Ischemic Stroke Patients with Nonvalvular Atrial Fibrillation and At Least One Microbleed: CMB-NOW Multisite Pilot Trial. *Journal of Stroke and Cerebrovascular Diseases*. 2019;28(7):1918-1925.
-



- 
- 2 Adeboyeje G, Sylwestrzak G, Barron JJ, White J, Rosenberg A, Abarca J, Crawford G, Redberg R. Major Bleeding Risk During Anticoagulation with Warfarin, Dabigatran, Apixaban, or Rivaroxaban in Patients with Nonvalvular Atrial Fibrillation. *J Manag Care Spec Pharm.* 2017;23(9):968-978.
  - 3 Lau WCY, Li X, Wong ICK, Man KKC, Lip GYH, Leung WK, Siu CW, Chan EW. Bleeding-related hospital admissions and 30-day readmissions in patients with non-valvular atrial fibrillation treated with dabigatran versus warfarin. *J THROMB HAEMOST.* 2017;15(10):1923-1933.
  - 4 Hernandez I, Zhang Y, Brooks MM, Chin PKL, Saba S. Anticoagulation Use and Clinical Outcomes After Major Bleeding on Dabigatran or Warfarin in Atrial Fibrillation. *STROKE.* 2017;48(1):159-166.
-

Supplemental Table 4. Classifications of ICH and diagnostic methods in the included studies

| Included studies | Classification of ICH |             |             |                   | Diagnostic methods |          |                           |
|------------------|-----------------------|-------------|-------------|-------------------|--------------------|----------|---------------------------|
|                  | Traumatic             | OAC-related | Spontaneous | No classification | Brain MRI          | Brain CT | Inpatients Medical Record |
| Komen-2021       | ×                     | ×           | ×           | √                 | √                  | √        | √                         |
| Lee-2020         | ×                     | ×           | √           | ×                 | √                  | √        | √                         |
| Tsai-2020        | ×                     | ×           | ×           | √                 | √                  | √        | √                         |
| Newman-2020      | ×                     | ×           | ×           | √                 | √                  | √        | √                         |
| Nielsen-2019     | ×                     | ×           | √           | ×                 | √                  | √        | √                         |
| Perreault-2019   | ×                     | ×           | ×           | √                 | √                  | √        | √                         |
| Nielsen-2017     | √                     | √           | √           | ×                 | √                  | √        | √                         |
| Chao-2016        | √                     | √           | √           | ×                 | √                  | √        | √                         |
| Park-2016        | ×                     | ×           | ×           | √                 | √                  | √        | √                         |
| Nielsen-2015     | ×                     | ×           | ×           | √                 | √                  | √        | √                         |
| Kuramatsu-2015   | ×                     | √           | √           | ×                 | √                  | √        | √                         |
| Lin-2022         | ×                     | ×           | ×           | √                 | √                  | √        | √                         |
| Lewis-2021       | ×                     | ×           | √           | ×                 | √                  | √        | √                         |
| Schreuder-2021   | ×                     | ×           | √           | ×                 | √                  | √        | √                         |

ICH= intracranial hemorrhage ; MRI= magnetic resonance imaging; CT= computerized tomography; “√” = study included this ICH classification or ICH was diagnosed by this method; “×” = study did not include this ICH classification nor ICH was diagnosed by this method.

**Supplemental Table 5. Statistical methods and weighted/adjusted risk factors in the included studies**

| <b>Included studies</b> | <b>Effect estimates</b> | <b>Statistical methods</b>                               | <b>Weighted or adjusted risk factors</b>                                                                                                                                                                                                                                                                                                                     |
|-------------------------|-------------------------|----------------------------------------------------------|--------------------------------------------------------------------------------------------------------------------------------------------------------------------------------------------------------------------------------------------------------------------------------------------------------------------------------------------------------------|
| Lewis-2021              | Hazard ratio            | Primary outcome: Cox regression model                    | Primary outcome: the time since ICH onset; ICH types<br><br>Secondary outcome: major vascular event, stroke, and stroke or vascular death                                                                                                                                                                                                                    |
|                         |                         | Secondary outcome: Cox regression model                  |                                                                                                                                                                                                                                                                                                                                                              |
| Schreuder-2021          | Hazard ratio            | Primary outcome: Cox regression model                    | Primary outcome: age and ICH location<br><br>Secondary outcome: recurrent ICH, all major hemorrhagic, occlusive and vascular events                                                                                                                                                                                                                          |
|                         |                         | Secondary outcome: Cox regression model                  |                                                                                                                                                                                                                                                                                                                                                              |
| Komen-2021              | Adjusted Hazard ratio   | Cox proportional hazards model                           | Age, sex, individual components of the Charlson Comorbidity Index, CHA2DS2-VASc score, modified HAS-BLED score, comorbidities (hypertension, diabetes mellitus, dyslipidemia, prior stroke, coronary heart disease, congestive heart failure, abnormal kidney function, abnormal liver function, anti-platelet medication), use of OACs                      |
| Lee-2020                | Hazard ratio            | Multivariable Cox proportional hazards regression models | Age, sex, CHA2DS2-VASc score, HAS-BLED score, Charlson comorbidity index, comorbidities (hypertension, diabetes mellitus, dyslipidemia, prior stroke, coronary heart disease, congestive heart failure, abnormal kidney function, abnormal liver function, anti-platelet medication), concomitant medication (aspirin, clopidogrel, dual antiplatelet, etc.) |

|                |                        |                                                            |                                                                                                                                                                                                                                                                                                                                                                                                                                             |
|----------------|------------------------|------------------------------------------------------------|---------------------------------------------------------------------------------------------------------------------------------------------------------------------------------------------------------------------------------------------------------------------------------------------------------------------------------------------------------------------------------------------------------------------------------------------|
| Tsai-2020      | Hazard ratio           | Multivariable Cox proportional hazards regression analysis | Age, sex, comorbidities (hypertension, diabetes mellitus, dyslipidemia, prior stroke, coronary heart disease, congestive heart failure, abnormal kidney function, abnormal liver function, anti-platelet medication), use of antiplatelet drugs, and CHA2DS2-VASc score                                                                                                                                                                     |
| Newman-2020    | Hazard ratio           | Cox proportional hazards models                            | Age, sex, race, comorbidities (hypertension, diabetes mellitus, dyslipidemia, prior stroke, coronary heart disease, congestive heart failure, abnormal kidney function, abnormal liver function, anti-platelet medication), ischemic stroke/TIA, TE, bleeding, CHADS2-VASc score, HAS-BLED score, and concomitant medication (aspirin, clopidogrel, dual antiplatelet, etc.)                                                                |
| Nielsen-2019   | Risk ratio             | Generalized linear model                                   | Age, sex, stroke severity category, days since hospital discharge , length of hospital stay for the index intracerebral hemorrhage event, reduced renal function, alcohol consumption, smoking status, CHA2DS2 -VASc score, and aspirin treatment                                                                                                                                                                                           |
| Perreault-2019 | Adjusted hazard ratios | Cox proportional hazard models                             | Age, sex, prior thromboembolism (stroke/TIA/SE) and major bleeding (except ICH), comorbidities (hypertension, diabetes mellitus, dyslipidemia, prior stroke, coronary heart disease, congestive heart failure, abnormal kidney function, abnormal liver function, anti-platelet medication), Score Charlson, CHA2DS2-VASc score, HAS-BLED score, length of stay, and concomitant medication (aspirin, clopidogrel, dual antiplatelet, etc.) |

|                |                        |                                                           |                                                                                                                                                                                                                                                                                                                                                                                                           |
|----------------|------------------------|-----------------------------------------------------------|-----------------------------------------------------------------------------------------------------------------------------------------------------------------------------------------------------------------------------------------------------------------------------------------------------------------------------------------------------------------------------------------------------------|
|                |                        |                                                           |                                                                                                                                                                                                                                                                                                                                                                                                           |
| Nielsen-2017   | Adjusted hazard ratios | Time-dependent Cox proportional hazards regression models | Age, sex, CHA2DS2-VASc score ,HAS-BLEDscore, prior previous thromboembolism, comorbidities (hypertension, diabetes mellitus, dyslipidemia, prior stroke, coronary heart disease, congestive heart failure, abnormal kidney function, abnormal liver function, anti-platelet medication), days in hospital from the index event and concomitant medication (aspirin, clopidogrel, dual antiplatelet, etc.) |
| Chao-2016      | Adjusted hazard ratios | Cox regression analysis                                   | Age, sex, CHA2DS2-VASc score, comorbidities (hypertension, diabetes mellitus, dyslipidemia, prior stroke, coronary heart disease, congestive heart failure, abnormal kidney function, abnormal liver function, anti-platelet medication), prior stroke/TIA, mean propensity score                                                                                                                         |
| Park-2016      | Hazard ratio           | Cox proportional hazards model                            | Age, sex,prior ischemic stroke, and previous warfarin medication                                                                                                                                                                                                                                                                                                                                          |
| Nielsen-2015   | Adjusted hazard ratio  | Cox proportional hazard model                             | Age; sex; year of inclusion; time since last claimed OAC prescription before the incident ICH event; CHA2DS2-VASc score and HAS-BLED score                                                                                                                                                                                                                                                                |
| Kuramatsu-2015 | Hazard ratio           | Multivariable regression analysis                         | Age, sex, comorbidities (hypertension, diabetes mellitus, dyslipidemia, prior stroke, coronary heart disease, congestive heart failure, abnormal kidney function, abnormal liver function, anti-platelet medication), medication (aspirin, clopidogrel, dual antiplatelet, etc.), CHADS2 score, HAS-BLED score, initial imaging, time windows                                                             |

|          |              |                                |                                                                                                                                                                                                                                                                                                                                                                                                                                                                                                                                                                                                                                                      |
|----------|--------------|--------------------------------|------------------------------------------------------------------------------------------------------------------------------------------------------------------------------------------------------------------------------------------------------------------------------------------------------------------------------------------------------------------------------------------------------------------------------------------------------------------------------------------------------------------------------------------------------------------------------------------------------------------------------------------------------|
|          |              |                                |                                                                                                                                                                                                                                                                                                                                                                                                                                                                                                                                                                                                                                                      |
| Lin-2022 | Hazard ratio | Cox proportional hazards model | Age, sex, prior comorbidities (congestive heart failure, hypertension, diabetes, coronary artery disease, myocardial infarction, peripheral artery disease, IS, transient ischemic attack, peripheral arterial occlusive disease, venous thromboembolism, pulmonary embolism, gastrointestinal bleeding, other bleeding events, liver disease, and renal disease), and medications (calcium channel blockers, renin-angiotensin system inhibitors, 3-hydroxy-3-methylglutaryl coenzyme A reductase inhibitors, non-steroidal anti-inflammatory drugs, class I and III anti-arrhythmic drugs, $\beta$ blockers, digoxin, and proton pump inhibitors). |

ICH= intracranial hemorrhage ; TIA= transient ischemic attack; SE= systemic embolism; CHA2DS2-VASc=congestive heart failure/left ventricular ejection fraction  $\leq 40\%$ , hypertension, age  $\geq 75$  years (2 points), diabetes mellitus, prior stroke/transient ischemic attack/thromboembolism (2 points), vascular disease, age 65-74 years, female sex; HAS-BLED=Hypertension, Abnormal liver/renal function, Stroke, Bleeding history or predisposition, Labile international normalized ratio, Elderly, Drugs/alcohol concomitantly.

Supplementary Table 6. Risk of bias assessment for randomized clinical trials

| Contents for risk assessment                              | Assessment justification                                                                                                                                                                                                                        | Ratings       |
|-----------------------------------------------------------|-------------------------------------------------------------------------------------------------------------------------------------------------------------------------------------------------------------------------------------------------|---------------|
| <b>Lewis-2021</b>                                         |                                                                                                                                                                                                                                                 |               |
| Random sequence generation (selection bias)               | A central, web-based, computerized randomization system applying a minimization algorithm randomly assigned participants (1:1) to initiate and stop anticoagulant treatment                                                                     | Low risk      |
| Allocation concealment (selection bias)                   | The unique study identification number was allocated to every participants who were administrated to oral anticoagulants                                                                                                                        | Low risk      |
| Blinding of participants and personnel (performance bias) | Participants, clinicians and local investigators knew the treatment assignments, but participant identity, treatment allocation, and drug use was unknown to event adjudicators                                                                 | Moderate risk |
| Blinding of outcome assessment (detection bias)           | Reports of every outcome events were performed by internal assessor -- one medically trained clinical research fellow, and investigators rated dependence and quality of life was evaluated by modified Rankin Scale and EQ-5D-5L, respectively | Low risk      |
| Incomplete outcome data (attrition bias)                  | Completeness of follow-up was performed by follow-up questionnaire at each planned interval after randomization                                                                                                                                 | Low risk      |
| Selective reporting (reporting bias)                      | NS                                                                                                                                                                                                                                              | UNCLEAR       |
| Other risk biases                                         | NS                                                                                                                                                                                                                                              | UNCLEAR       |

| <b>Schreuder-2021</b>                                     |                                                                                                                                                                                                                                                                   |           |
|-----------------------------------------------------------|-------------------------------------------------------------------------------------------------------------------------------------------------------------------------------------------------------------------------------------------------------------------|-----------|
| Random sequence generation (selection bias)               | Participants were (1:1) randomly allocated by a central computerized randomization system to either apixaban and stop anticoagulant treatment                                                                                                                     | Low risk  |
| Allocation concealment (selection bias)                   | Treatment assignment was known to participants, their treating physicians, and local investigators                                                                                                                                                                | High risk |
| Blinding of participants and personnel (performance bias) | Treatment assignment was known to participants, their treating physicians, and local investigators                                                                                                                                                                | High risk |
| Blinding of outcome assessment (detection bias)           | The adjudication committee accessing all potential outcomes was not aware of patient identity, treatment allocation, and drugs used; two neurologists with neurovascular expertise (LJK and GJER) and a cardiologist (H M Nathoe) were composed of this committee | Low risk  |
| Incomplete outcome data (attrition bias)                  | All participants were included in this study                                                                                                                                                                                                                      | Low risk  |
| Selective reporting (reporting bias)                      | NS                                                                                                                                                                                                                                                                | UNCLEAR   |
| Other risk biases                                         | NS                                                                                                                                                                                                                                                                | UNCLEAR   |

EQ-5D-5L=five-level EuroQol five-dimensional questionnaire



Supplementary Table 7. Quality assessment for observational cohorts using the NOS tool

| Included studies          | Selection (0-4 points)               |                                 |                           |                                                                          | Comparability (0-2 points)            |                               | Outcome (0-3 points)  |                  |                        | Total points |
|---------------------------|--------------------------------------|---------------------------------|---------------------------|--------------------------------------------------------------------------|---------------------------------------|-------------------------------|-----------------------|------------------|------------------------|--------------|
|                           | Representativeness of Exposed Cohort | Selection of Non-Exposed Cohort | Ascertainment Of Exposure | Demonstration That Outcome of Interest Was Not Present at Start of Study | Adjust for the important Risk factors | Adjust for other risk factors | Assessment of outcome | Follow-up length | Loss to follow-up rate |              |
| Komen-2021                | 1                                    | 1                               | 1                         | 1                                                                        | 1                                     | 1                             | 1                     | 0                | 1                      | 8            |
| Lee-2020                  | 1                                    | 1                               | 1                         | 0                                                                        | 1                                     | 1                             | 1                     | 1                | 1                      | 8            |
| Tsai-2020                 | 1                                    | 1                               | 1                         | 0                                                                        | 1                                     | 1                             | 1                     | 1                | 1                      | 8            |
| Newman-2020               | 1                                    | 1                               | 1                         | 0                                                                        | 1                                     | 1                             | 1                     | 1                | 1                      | 8            |
| Nielsen-2019              | 1                                    | 1                               | 1                         | 0                                                                        | 1                                     | 1                             | 1                     | 1                | 1                      | 8            |
| Perreault-2019            | 1                                    | 1                               | 1                         | 1                                                                        | 1                                     | 1                             | 1                     | 1                | 1                      | 9            |
| Nielsen-2017 <sup>#</sup> | 1                                    | 1                               | 1                         | 1                                                                        | 1                                     | 1                             | 1                     | 1                | 1                      | 9            |
| Chao-2016                 | 1                                    | 1                               | 1                         | 1                                                                        | 1                                     | 1                             | 1                     | 1                | 1                      | 9            |
| Park-2016                 | 1                                    | 1                               | 1                         | 1                                                                        | 1                                     | 1                             | 1                     | 1                | 1                      | 9            |
| Nielsen-2015              | 1                                    | 1                               | 1                         | 1                                                                        | 1                                     | 1                             | 1                     | 1                | 1                      | 9            |
| Kuramatsu-2015            | 1                                    | 1                               | 1                         | 1                                                                        | 1                                     | 1                             | 1                     | 1                | 1                      | 9            |
| Lin-2022                  | 1                                    | 1                               | 1                         | 1                                                                        | 1                                     | 1                             | 1                     | 1                | 1                      | 9            |

<sup>#</sup> only used in the subgroup analysis of vitamin-K antagonists (VKAs) versus no VKAs. NOS=Newcastle-Ottawa Scale.

Supplementary Table 8. The publication bias assessed using the Egger's and Begg's tests

| Outcomes                    | OACs versus no OACs |                   |                  | VKAs versus no VKAs |                   |                  | NOACs versus VKAs |                   |                  |
|-----------------------------|---------------------|-------------------|------------------|---------------------|-------------------|------------------|-------------------|-------------------|------------------|
|                             | Number of studies   | Egger's (P-value) | Begg's (P-value) | Number of studies   | Egger's (P-value) | Begg's (P-value) | Number of studies | Egger's (P-value) | Begg's (P-value) |
| Stroke or systemic embolism | 6                   | 0.052 *           | 0.707            | 4                   | 0.036 *           | 0.089            | -                 | -                 | -                |
| Ischemic stroke             | 4                   | 0.464             | 0.734            | 4                   | 0.111             | 0.308            | 4                 | 0.780             | 0.734            |
| All-cause death             | 7                   | 0.041 *           | 0.368            | -                   | -                 | -                | 4                 | 0.931             | 1.000            |
| Intracranial hemorrhage     | 7                   | 0.212             | 0.548            | 3                   | 0.461             | 1.000            | 4                 | 0.988             | 0.734            |
| Major bleeding              | 5                   | 0.674             | 0.806            | -                   | -                 | -                | -                 | -                 | -                |

\* The results from the trim-and-fill analysis showed no trimming performed, and the corresponding pooled results were not changed.

**Supplemental Table 9. Ongoing RCTs including patients with AF after ICH**

| <b>Name</b>     | <b>Number</b>   | <b>Sample size</b> | <b>Included experimental group and control group</b>                                               |
|-----------------|-----------------|--------------------|----------------------------------------------------------------------------------------------------|
| STATICH         | NCT0318<br>6729 | 500 participants   | Experimental group: with anticoagulant treatment<br>Control group: with no anticoagulant treatment |
| PRESTIGE-A<br>F | NCT0399<br>6772 | 654 patients       | Experimental group: with DOAC treatment<br>Control group: with no anticoagulant treatment          |
| ENRICH-AF       | NCT0395<br>0076 | 1200 patients      | Experimental group: with edoxaban treatment<br>Control group: with no anticoagulant treatment      |
| A3ICH           | NCT0324<br>3175 | 300 patients       | Experimental group: with apixaban treatment<br>Control group: with LAA occlusion treatment         |
| ASPIRE          | NCT0390<br>7046 | 700 patients       | Experimental group: with apixaban treatment<br>Control group: with aspirin treatment               |

RCT=randomized clinical trial; STATICH= study of antithrombotic treatment after intracerebral hemorrhage; PRESTIGE-AF=prevention of stroke in intracerebral haemorrhage survivors with atrial fibrillation; ENRICH-AF=edoxaban for intracranial hemorrhage survivors with atrial fibrillation; A3ICH=avoiding anticoagulation after intracerebral haemorrhage; ASPIRE=anticoagulation in ICH survivors for stroke prevention and recovery; DOAC=direct oral anticoagulant; LAA=left atrial appendage

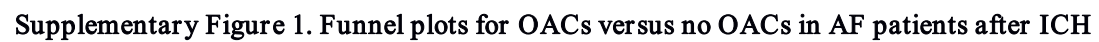

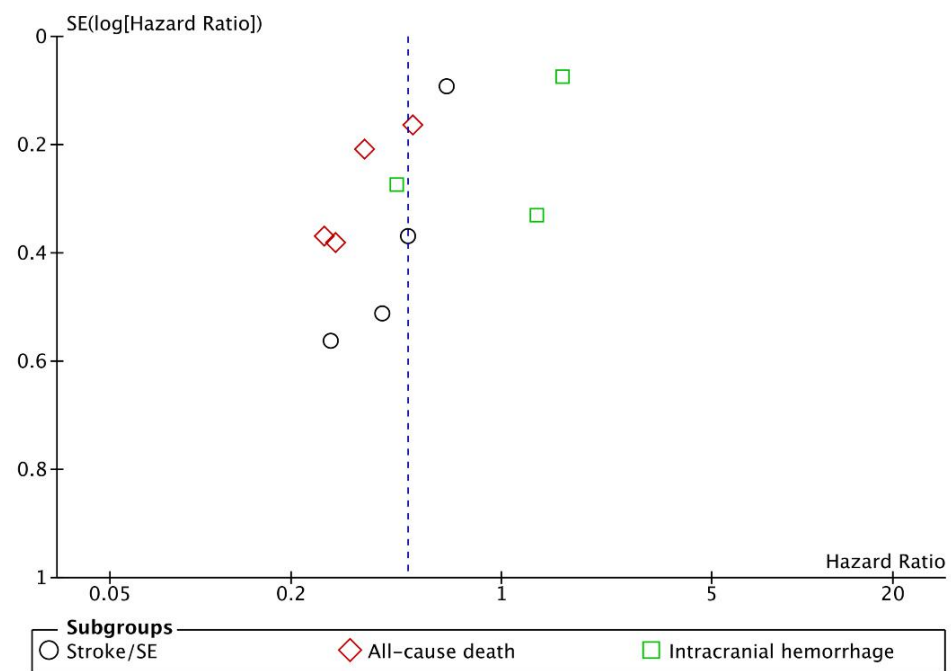

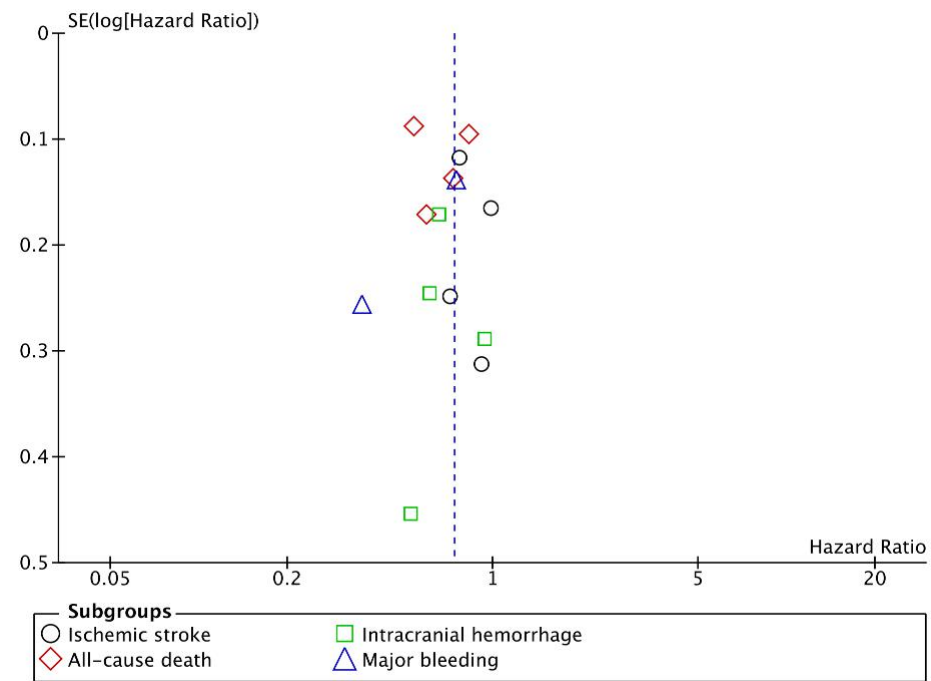

**Supplementary Figure 3. Funnel plots for NOACs versus VKAs in AF patients after ICH**
